# Supplementary material for: ATase inhibition rescues age-associated proteotoxicity of the secretory pathway
Source: PubMed Central journal article supplement (PMC8881600; doi:10.1038/s42003-022-03118-0), 2022-02-25
Supplement: 42003_2022_3118_MOESM2_ESM.pdf [file 42003_2022_3118_MOESM2_ESM.pdf]

**SUPPLEMENTARY INFORMATION**

**ATase inhibition rescues age-associated proteotoxicity of the secretory pathway**

Maeghan Murie, Yajing Peng, Michael J. Rigby, Inca A. Dieterich, Mark A. Farrugia,

Andreas Endresen, Anita Bhattacharyya, Luigi Puglielli

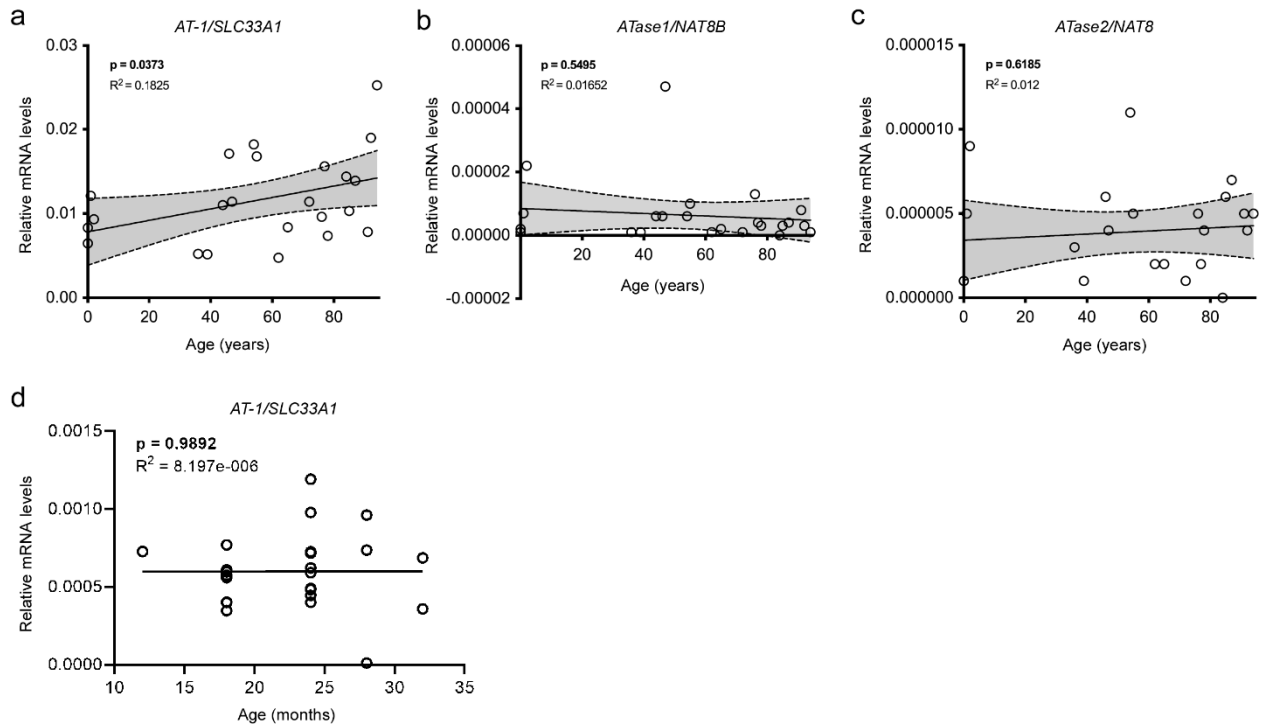

**Supplementary Figure 1. *AT-1* is upregulated as a function of age in human fibroblasts.**

(a-c) mRNA levels of *AT-1* were measured in 24 human fibroblasts, and normalized to *GAPDH* expression. A univariate linear regression analysis was run ( $Y = 9.149e-009 * X + 3.419e-006$ ;  $F=0.2554$ ) and significance is reported within the figure. (d) mRNA levels of *AT-1* were measured in the brain of C57BL/6 from the NIA aging mouse cohort, and normalized to *GAPDH* levels.

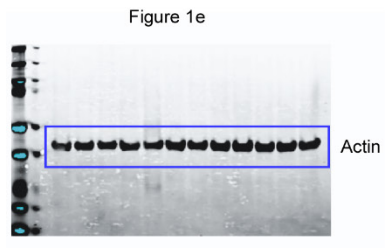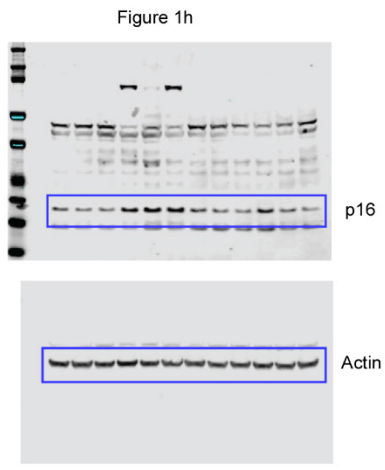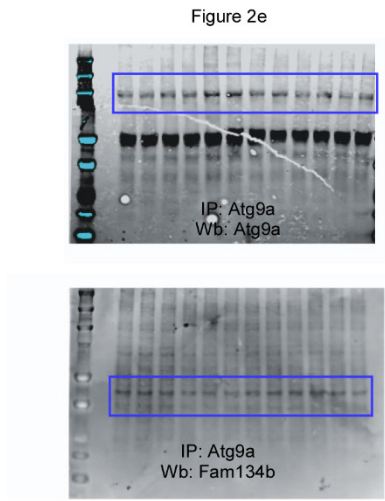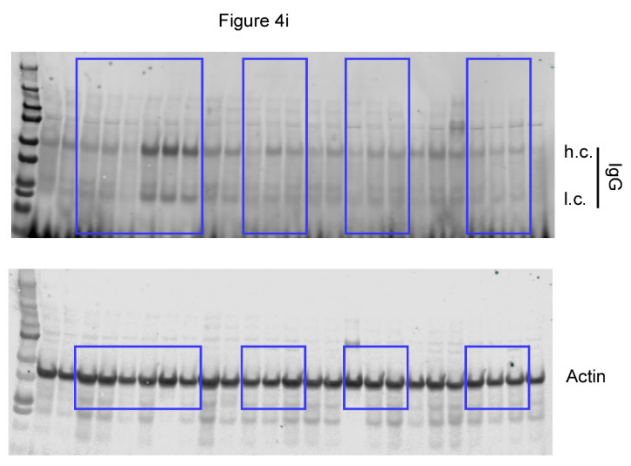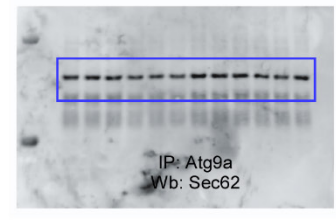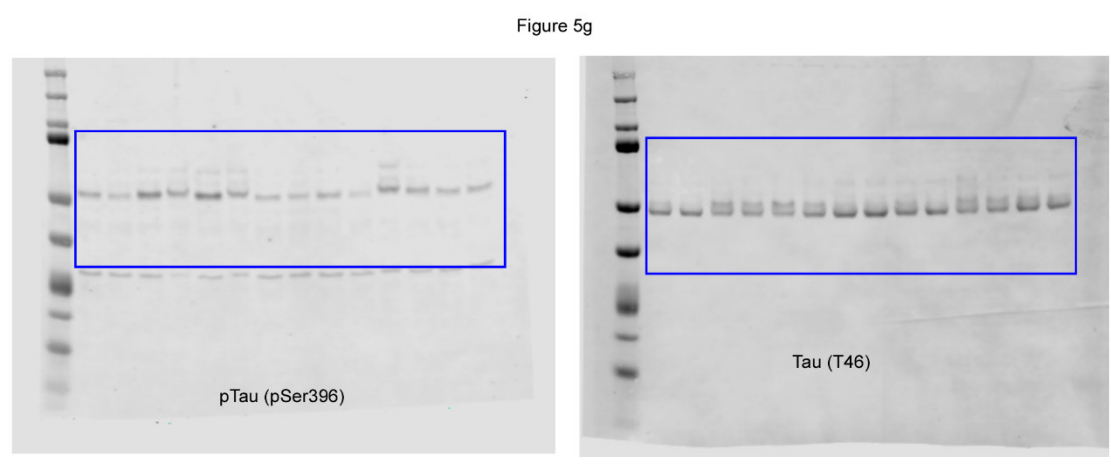

Supplementary Figure 2. Uncropped Gels.

Figure 6b

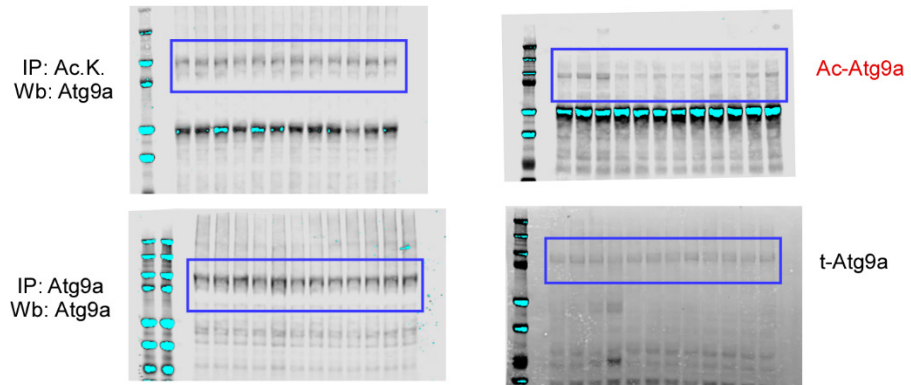

Figure 6e

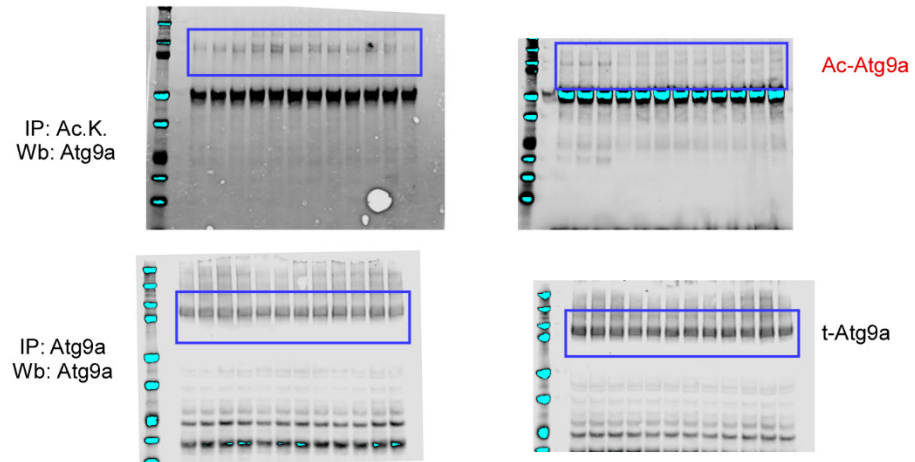

**Supplementary Figure 3. Uncropped Gels.**

### Supplementary Table 1

List of the ATase inhibitors shown in Figure 3b and 3d

| <b>Compound</b> | <b>ZINC15 ID</b> | <b>ATase 1<br/>(% inhibition)</b> | <b>ATase 2<br/>(% inhibition)</b> |
|-----------------|------------------|-----------------------------------|-----------------------------------|
| Cmp 1           | 166974           | 53                                | 63                                |
| Cmp 2           | 1038971          | 53                                | 83                                |
| Cmp 3           | 3128876          | 40                                | 78                                |
| Cmp 4           | 95742794         | 57                                | 86                                |
| Cmp 5           | 116271           | 55                                | 85                                |
| Cmp 6           | 2573087          | 49                                | 65                                |
| Cmp 7           | 3957707          | 49                                | 80                                |
| Cmp 8           | 1036814          | 56                                | 90                                |
| Cmp 9           | 4037676          | 74                                | 88                                |
| Cmp10           | 155800           | 52                                | 80                                |
| Cmp 11          | 160333           | 43                                | 74                                |
| Cmp 12          | 163101           | 42                                | 84                                |
| Cmp 13          | 171969           | 37                                | 78                                |
| Cmp 14          | 172750           | 50                                | 76                                |
| Cmp 15          | 71157            | 52                                | 78                                |
| Cmp 16          | 71274            | 52                                | 68                                |
| Cmp 17          | 4381858          | 66                                | 85                                |
| Cmp 18          | 13467976         | 25                                | 65                                |
| Cmp 19          | 87491            | 56                                | 74                                |
| Cmp 20          | 87596            | 56                                | 83                                |
| Cmp 21          | 4361452          | 60                                | 64                                |
| Cmp 22          | 97832            | 50                                | 76                                |
| Cmp 23          | 4377447          | 54                                | 78                                |
| Cmp 24          | 102932           | 50                                | 65                                |
| Cmp 25          | 17284974         | 50                                | 50                                |
| Cmp 26          | 4390342          | 55                                | 61                                |
| Cmp 27          | 111475           | 67                                | 66                                |
| Cmp 28          | 13658476         | 48                                | 79                                |
| Cmp 29          | 120763           | 32                                | 81                                |
| Cmp 30          | 1047729          | 53                                | 81                                |

NOTE: Inhibition is as determined by the high throughput screen. Each compound was used at the final concentration of 10 $\mu$ m. The percent of inhibition is expressed as the mean of N=3.

## Supplementary Table 2

Plasma pharmacokinetic parameters of Compound 9 and 19

| Parameters                 | Unit    | Compound 9 | Compound 19 |
|----------------------------|---------|------------|-------------|
| T <sub>1/2</sub>           | h       | 3.38       | 10.3        |
| T <sub>max</sub>           | h       | 2          | 0.0833      |
| C <sub>max</sub>           | ng/mL   | 395        | 235         |
| AUC <sub>last</sub>        | h*ng/mL | 2298       | 297         |
| AUC <sub>Inf</sub>         | h*ng/mL | 2903       | 586         |
| AUC <sub>%Extrap obs</sub> | %       | 20.8       | 49.4        |
| MRT <sub>Inf obs</sub>     | h       | 5.41       | 12.6        |
| AUC <sub>last/D</sub>      | h*mg/mL | 230        | 29.7        |
| F                          | %       | 117        | 807         |

NOTE: Compounds were administered orally at the final concentration of 10mg/Kg. PK data were collected in C57BL/6 WT/Non-Tg mice (N=3).

### Supplementary Table 3.

List of human fibroblasts used with age

| <b>Cell line</b> | <b>Age</b> | <b>Source</b> |
|------------------|------------|---------------|
| WC 5803          | Neonate    | UW-Madison    |
| WC6007           | Neonate    | UW-Madison    |
| AG01521          | 3 day      | Coriell       |
| AG08498          | 1 yr       | Coriell       |
| AG07095          | 2 yr       | Coriell       |
| WC0603           | 36 yr      | UW-Madison    |
| WC0504           | 39 yr      | UW-Madison    |
| AG06282          | 44 yr      | Coriell       |
| AG12954          | 46 yr      | Coriell       |
| AG07118          | 47 yr      | Coriell       |
| AG13093          | 54 yr      | Coriell       |
| AG05840          | 55 yr      | Coriell       |
| WC0306           | 62 yr      | UW-Madison    |
| AG04357          | 65 yr      | Coriell       |
| WC0405           | 72 yr      | UW-Madison    |
| AG11743          | 76 yr      | Coriell       |
| AG09879          | 77 yr      | Coriell       |
| AG12997          | 78 yr      | Coriell       |
| AG11725          | 84 yr      | Coriell       |
| AG13077          | 85 yr      | Coriell       |
| AG10884          | 87 yr      | Coriell       |
| AG07725          | 91 yr      | Coriell       |
| AG09602          | 92 yr      | Coriell       |
| AG08433          | 94 yr      | Coriell       |
