# Supplementary material for: ATase inhibition rescues age-associated proteotoxicity of the secretory pathway
Source: PubMed Central journal article supplement (PMC8881600; doi:10.1038/s42003-022-03118-0), 2022-02-25
Supplement: 42003_2022_3118_MOESM3_ESM.pdf [file 42003_2022_3118_MOESM3_ESM.pdf]

## Description of Additional Supplementary Files

**File name:** Supplementary Data 1

**Description:** List of compounds analyzed with the Modified Lipinski's Rule (for CNS delivery).

**File name:** Supplementary Data 2

**Description:** Data underlying the graphs and charts within the main figures.
